# Supplementary material
Source: MDPI journal article supplement (https://www.mdpi.com/1996-1073/11/8/2026)
Supplement: s1 [file s1]

# Prospecting for Oleaginous and Robust *Chlorella* spp. for Coal-Fired Flue-Gas-Mediated Biodiesel Production

Bohwa Kim <sup>1,†</sup>, Ramasamy Praveenkumar <sup>2,†</sup>, Eunji Choi <sup>3</sup>, Kyubock Lee <sup>4</sup>, Sang Goo Jeon <sup>3</sup> and You-Kwan Oh <sup>5,\*</sup>

<sup>1</sup> Advanced Biomass R&D Center, Korea Advanced Institute of Science and Technology (KAIST), Daejeon 34141, Korea; [kbh87@kaist.ac.kr](mailto:kbh87@kaist.ac.kr)

<sup>2</sup> Aquatic Biology Laboratory, and Renewable Materials and Nanotechnology Group, KU Leuven, Campus Kulak, 8500 Kortrijk, Belgium; [praveen.ramasamy@kuleuven.be](mailto:praveen.ramasamy@kuleuven.be)

<sup>3</sup> Biomass and Waste Energy Laboratory, Korea Institute of Energy Research (KIER), Daejeon 34129, Korea; [eunsie@hanmail.net](mailto:eunsie@hanmail.net) (E.C.); [sgjeon@kier.re.kr](mailto:sgjeon@kier.re.kr) (S.G.J.)

<sup>4</sup> Graduate School of Energy Science and Technology, Chungnam National University (CNU), Daejeon 34134, Korea; [kyubock.lee@cnu.ac.kr](mailto:kyubock.lee@cnu.ac.kr)

<sup>5</sup> School of Chemical and Biomolecular Engineering, Pusan National University (PNU), Busan 46241, Korea

\* Correspondence: [youkwan@pusan.ac.kr](mailto:youkwan@pusan.ac.kr); Tel.: +82-51-510-2395; Fax: +82-51-512-8563

† Equally Contributing Authors.

(a)

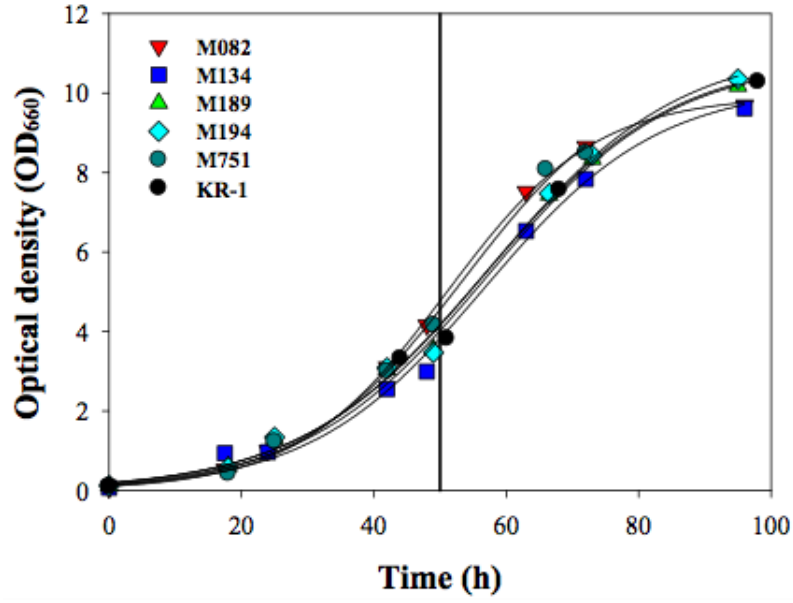

(b)

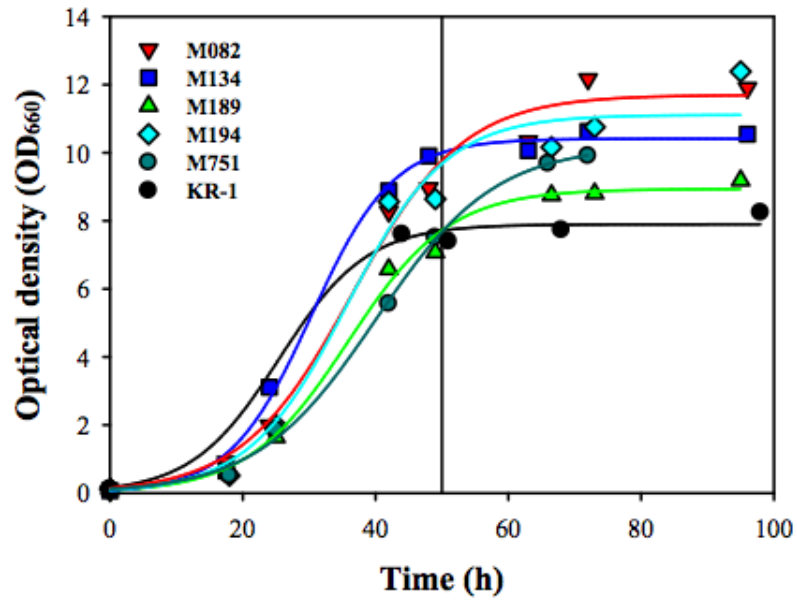

**Figure S1.** Growth curve of 6 fast-growing *Chlorella* strains under (a) autotrophic and (b) mixotrophic conditions for 96 h of cultivation. The mixotrophic cultures were supplemented with 5 g glucose/L. The vertical line represents the time point (50 h) used for screening the fast-growing strains.

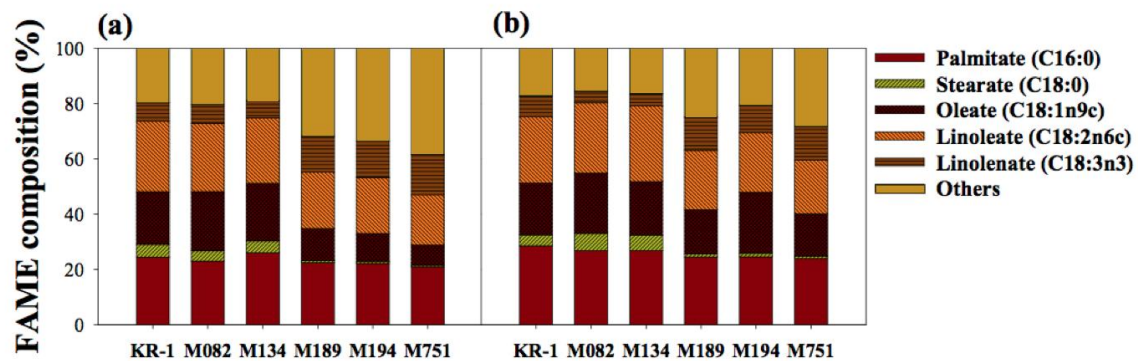

**Figure S2.** FAME distributions of 6 fast-growing *Chlorella* strains under (a) autotrophic and (b) mixotrophic indoor conditions for 96 h of cultivation. The “other” FAMEs are caprate (C10:0), tridecanoate (C13:0), myristate acid (C14:0), pentadecanoate (C15:0), palmitoleate (C16:1),  $\gamma$ -linoleate (C18:3n6), arachidate (C20:0), cis-11-icosenoate (C20:1), behenate (C22:0), lignocerate (C24:0) and other fatty acids (group of fatty acids each accounting for less than 0.5% of total fatty acids).

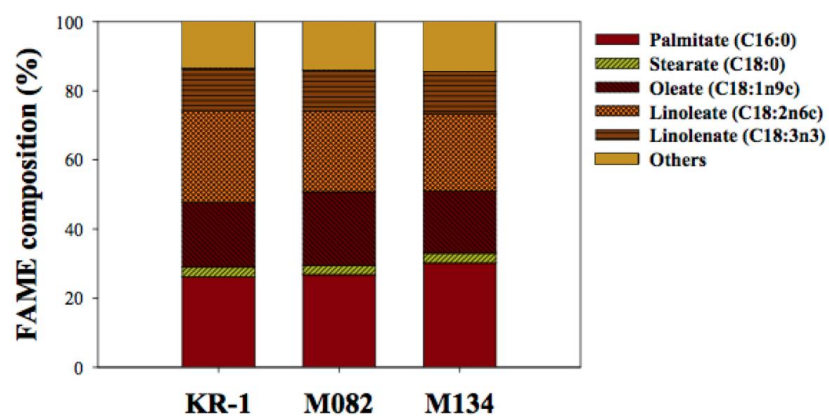

**Figure S3.** FAME distribution of 3 high-productivity *Chlorella* strains in outdoor culture mediated by coal-fired flue-gas. The “other” FAMES are caprate (C10:0), tridecanoate (C13:0), myristate (C14:0), pentadecanoate (C15:0), palmitoleate (C16:1),  $\gamma$ -linoleate (C18:3n6), arachidate (C20:0), cis-11-icosenoate (C20:1), behenate (C22:0), lignocerate (C24:0) and other fatty acids (group of fatty acids each accounting for less than 0.5% of total fatty acids).

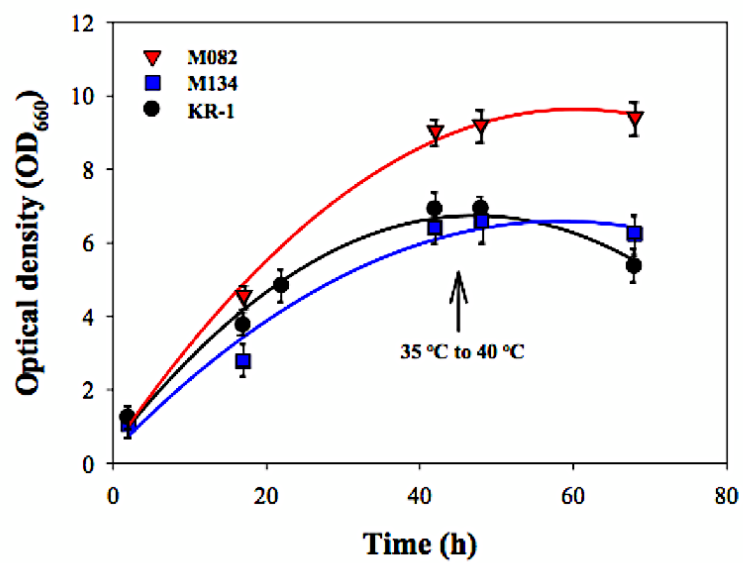

**Figure S4.** Growth patterns of 3 high-productivity *Chlorella* strains under high-temperature conditions. The arrow represents the time point of the temperature increase from the initial of 35 °C to 40 °C.
